# Supplementary material for: Ecological Genetics of Chinese Rhesus Macaque in Response to Mountain Building: All Things Are Not Equal
Source: PLoS One. 2013 Feb 6;8(2):e55315. doi: 10.1371/journal.pone.0055315 (PMC3566204; doi:10.1371/journal.pone.0055315)
Supplement: Table S1 — The distribution of 214 D-loop haplotypes in each sampling location of wild Chinese rhesus macaques, Macaca mulatta. The first 92 haplotypes were sequenced in this study and the last 122 haplotypes were downloaded from GenBank. The 67 haplotypes colored in red were selected for concatenation with other mtDNA genes. (XLS) [file pone.0055315.s002.xls]

## Sheet: Sheet1
Table S1. The distribution of 214 Macaca mulatta's D-loop haplotypes in each sampling locations.The first 92 haplotypes are sequcenced in this study, and the last 122 haplotypes (including 15 Ding's unpublished data, 56 Smith's data, and 51 Li's data ) are download from Genebank. 67 haplotypes coloured by red were selected for the second data set.
	YUNNAN					SICHUAN				GZ	GX	HN	FJ	AH	ZJ	HI	HA	Viet Nam	Myanmar	India	Nepal	number of sample
	YNJG	YNSM	YNMJ	YNZY	OTHER	SCML	SCDB	SCJY	SC'
Hap_1														1	1							2	[AHHUANG1444.seq	MM_ZJ244.seq]
Hap_2														9								9	[AHHUANG1445.seq	AHHUANG1450.seq	AHHUANG1451.seq	AHHUANG1453.seq	AHHUANG1457.seq	AHHUANG1459.seq	AHHUANG1462.seq	AHHUANG1465.seq	AHHUANG1466.seq]
Hap_3													1	16								17	[AHHUANG1446.seq	AHHUANG1447.seq	AHHUANG1448.seq	AHHUANG1452.seq	AHHUANG1455.seq	AHHUANG1456.seq	AHHUANG1458.seq	AHHUANG1460.seq	AHHUANG1463.seq	AHHUANG1464.seq	AHHUANG1467.seq	AHHUANG1468.seq	AHHUANG1469.seq	AHHUANG1470.seq	AHHUANG1471.seq	AHHUANG1473.seq	MM_FJ251.seq]
Hap_4														2								2	[AHHUANG1449.seq	AHHUANG1461.seq]
Hap_5														2								2	[AHHUANG1454.seq	AHHUANG1472.seq]
Hap_6																	31					31	[Dloop_D12.seq	Dloop_D13.seq	Dloop_D14.seq	Dloop_D26.seq	Dloop_D28.seq	Dloop_HA01.seq	Dloop_HA02.seq	Dloop_HA03.seq	Dloop_HA04.seq	Dloop_HA05.seq	Dloop_HA06.seq	Dloop_HA07.seq	Dloop_HA08.seq	Dloop_HA10.seq	Dloop_HA12.seq	Dloop_HA13.seq	Dloop_HA14.seq	Dloop_HA15.seq	Dloop_HA16.seq	Dloop_HA17.seq	Dloop_HA18.seq	Dloop_HA19.seq	Dloop_HA20.seq	Dloop_HA21.seq	Dloop_HA22.seq	Dloop_HA23.seq	Dloop_HA24.seq
Hap_7																	1					1	[Dloop_HA09.seq]
Hap_8																	3					3	[Dloop_HA30.seq	Dloop_HA31.seq	Dloop_HA32.seq]
Hap_9																18						18	[Dloop_HI1527.seq	Dloop_HI1528.seq	Dloop_HI1529.seq	Dloop_HI1530.seq	Dloop_HI1531.seq	Dloop_HI1532.seq	Dloop_HI1534.seq	Dloop_HI1535.seq	Dloop_HI1537.seq	Dloop_HI1542.seq	Dloop_HI1544.seq	Dloop_HI1548.seq	Dloop_HI1549.seq	Dloop_HI1554.seq	Dloop_HI1557.seq	Dloop_HI1558.seq	Dloop_HI1559.seq	MM_HI537.seq]
Hap_10						14																14	[MM_01SCML.seq	MM_03SCML.seq	MM_06SCML.seq	MM_08SCML.seq	MM_09SCML.seq	MM_11SCML.seq	MM_14SCML.seq	MM_18SCML.seq	MM_19SCML.seq	MM_20SCML.seq	MM_21SCML.seq	MM_23SCML.seq	MM_24SCML.seq	MM_25SCML.seq]
Hap_11						11																11	[MM_02SCML.seq	MM_04SCML.seq	MM_07SCML.seq	MM_13SCML.seq	MM_15SCML.seq	MM_16SCML.seq	MM_17SCML.seq	MM_27SCML.seq	MM_28SCML.seq	MM_29SCML.seq	MM_30SCML.seq]
Hap_12						5																5	[MM_05SCML.seq	MM_10SCML.seq	MM_12SCML.seq	MM_22SCML.seq	MM_26SCML.seq]
Hap_13							28															28	[MM_31SCDB.seq	MM_32SCDB.seq	MM_33SCDB.seq	MM_34SCDB.seq	MM_35SCDB.seq	MM_36SCDB.seq	MM_38SCDB.seq	MM_39SCDB.seq	MM_40SCDB.seq	MM_41SCDB.seq	MM_42SCDB.seq	MM_43SCDB.seq	MM_44SCDB.seq	MM_45SCDB.seq	MM_46SCDB.seq	MM_47SCDB.seq	MM_48SCDB.seq	MM_49SCDB.seq	MM_50SCDB.seq	MM_51SCDB.seq	MM_52SCDB.seq	MM_53SCDB.seq	MM_54SCDB.seq	MM_55SCDB.seq	MM_56SCDB.seq	MM_57SCDB.seq	MM_59SCDB.seq
Hap_14							1		1													2	[MM_58SCDB.seq	GQ472246Sichuan3]
Hap_15								2	1													3	[MM_61SCJY.seq	MM_63SCJY.seq	GQ472286Sichuan49]
Hap_16								1	1													2	[MM_62SCJY.seq	GQ472282Sichuan45]
Hap_17								3	1													4	[MM_64SCJY.seq	MM_65SCJY.seq	MM_69SCJY.seq	GQ472285Sichuan48]
Hap_18								1														1	[MM_66SCJY.seq]
Hap_19								1	1													2	[MM_67SCJY.seq	GQ472280Sichuan43]
Hap_20								1														1	[MM_68SCJY.seq]
Hap_21								1														1	[MM_70SCJY.seq]
Hap_22													1									1	[MM_FJ248.seq]
Hap_23													1									1	[MM_FJ249.seq]
Hap_24													1									1	[MM_FJ253.seq]
Hap_25													2									2	[MM_FJ398.seq	MM_FJ403.seq]
Hap_26													1									1	[MM_FJ402.seq]
Hap_27													1									1	[MM_FJ404.seq]
Hap_28													1									1	[MM_FJ405.seq]
Hap_29													1									1	[MM_FJ418.seq]
Hap_30													1									1	[MM_FJ422.seq]
Hap_31													1									1	[MM_FJ442.seq]
Hap_32											1											1	[MM_GX254.seq]
Hap_33											1											1	[MM_GX255.seq]
Hap_34											1											1	[MM_GX256.seq]
Hap_35											1											1	[MM_GX257.seq]
Hap_36											1											1	[MM_GX262.seq]
Hap_37											1											1	[MM_GX535.seq]
Hap_38										1												1	[MM_GZ575.seq]
Hap_39										2												2	[MM_GZ576.seq	MM_GZ577.seq]
Hap_40																		2				2	[MM_V264.seq	MM_V267.seq]
Hap_41																		1				1	[MM_V265.seq]
Hap_42																		1				1	[MM_V266.seq]
Hap_43																		1				1	[MM_V268.seq]
Hap_44																		1				1	[MM_V269.seq]
Hap_45																		1				1	[MM_V270.seq]
Hap_46					1																	1	[MM_YN343.seq]
Hap_47					1																	1	[MM_YN344.seq]
Hap_48	1	4		3	1																	9	[MM_YN350.seq	YNJG1345.seq	YNSM1391.seq	YNSM1399.seq	YNSM1403.seq	YNSM1404.seq	YNZY1435.seq	YNZY1437.seq	YNZY1438.seq]
Hap_49					1																	1	[MM_YN353.seq]
Hap_50					1																	1	[MM_YN356.seq]
Hap_51					1																	1	[MM_YN358.seq]
Hap_52					1																	1	[MM_YN360.seq]
Hap_53	1	4																				5	[MM_YN559.seq	MM_YN567.seq	MM_YN569.seq	MM_YN584.seq	YNJG1383.seq]
Hap_54	1	3																				4	[MM_YN565.seq	MM_YN568.seq	YNJG1356.seq	YNSM1422.seq]
Hap_55	3	1																				4	[MM_YN570.seq	YNJG1342.seq	YNJG1343.seq	YNJG1344.seq]
Hap_56		1																				1	[MM_YN572.seq]
Hap_57		1																				1	[MM_YN573.seq]
Hap_58															1							1	[MM_ZJ240.seq]
Hap_59															1							1	[MM_ZJ241.seq]
Hap_60															1							1	[MM_ZJ242.seq]
Hap_61															1							1	[MM_ZJ243.seq]
Hap_62															1							1	[MM_ZJ245.seq]
Hap_63															1							1	[MM_ZJ246.seq]
Hap_64															1							1	[MM_ZJ247.seq]
Hap_65	1		3																			4	[YNJG1341.seq	YNMJ1430.seq	YNMJ1431.seq	YNMJ1432.seq]
Hap_66	13	3																				16	[YNJG1346.seq	YNJG1347.seq	YNJG1348.seq	YNJG1350.seq	YNJG1351.seq	YNJG1354.seq	YNJG1358.seq	YNJG1361.seq	YNJG1362.seq	YNJG1365.seq	YNJG1375.seq	YNJG1379.seq	YNJG1389.seq	YNSM1392.seq	YNSM1400.seq	YNSM1417.seq]
Hap_67	3																					3	[YNJG1349.seq	YNJG1352.seq	YNJG1353.seq]
Hap_68	10	4																				14	[YNJG1355.seq	YNJG1357.seq	YNJG1359.seq	YNJG1360.seq	YNJG1363.seq	YNJG1364.seq	YNJG1366.seq	YNJG1374.seq	YNJG1377.seq	YNJG1381.seq	YNSM1396.seq	YNSM1407.seq	YNSM1414.seq	YNSM1425.seq]
Hap_69	1																					1	[YNJG1367.seq]
Hap_70	1																					1	[YNJG1368.seq]
Hap_71	3	2	1																			6	[YNJG1369.seq	YNJG1370.seq	YNJG1390.seq	YNMJ1429.seq	YNSM1395.seq	YNSM1408.seq]
Hap_72	3	7																				10	[YNJG1371.seq	YNJG1376.seq	YNJG1378.seq	YNSM1413.seq	YNSM1418.seq	YNSM1419.seq	YNSM1420.seq	YNSM1423.seq	YNSM1424.seq	YNSM1426.seq]
Hap_73	3																					3	[YNJG1372.seq	YNJG1373.seq	YNJG1380.seq]
Hap_74	1		1																			2	[YNJG1382.seq	YNMJ1428.seq]
Hap_75	1																					1	[YNJG1384.seq]
Hap_76	4																					4	[YNJG1385.seq	YNJG1386.seq	YNJG1387.seq	YNJG1388.seq]
Hap_77		3	1	1																		5	[YNMJ1427.seq	YNSM1406.seq	YNSM1410.seq	YNSM1421.seq	YNZY1439.seq]
Hap_78			1	2																		3	[YNMJ1433.seq	YNZY1442.seq	YNZY1443.seq]
Hap_79		1																				1	[YNSM1393.seq]
Hap_80		2																				2	[YNSM1394.seq	YNSM1416.seq]
Hap_81		1																				1	[YNSM1397.seq]
Hap_82		1		1																		2	[YNSM1398.seq	YNZY1440.seq]
Hap_83		1																				1	[YNSM1401.seq]
Hap_84		1																				1	[YNSM1402.seq]
Hap_85		1																				1	[YNSM1405.seq]
Hap_86		1																				1	[YNSM1409.seq]
Hap_87		1																				1	[YNSM1411.seq]
Hap_88		1																				1	[YNSM1412.seq]
Hap_89		1		1																		2	[YNSM1415.seq	YNZY1434.seq]
Hap_90				1																		1	[YNZY1436.seq]
Hap_91				1																		1	[YNZY1441.seq]
Hap_92												30										30	[zhangjj1.seq	zhangjj11.seq	zhangjj12.seq	zhangjj13.seq	zhangjj14.seq	zhangjj15.seq	zhangjj16.seq	zhangjj17.seq	zhangjj18.seq	zhangjj19.seq	zhangjj2.seq	zhangjj20.seq	zhangjj21.seq	zhangjj22.seq	zhangjj24.seq	zhangjj26.seq	zhangjj31.seq	zhangjj34.seq	zhangjj35.seq	zhangjj36.seq	zhangjj39.seq	zhangjj4.seq	zhangjj40.seq	zhangjj41.seq	zhangjj42.seq	zhangjj49.seq	zhangjj5.seq
Hap_93:											1											1	[AF135285_Guangxi1]
Hap_94:											1											1	[AF135286_Guangxi2]
Hap_95:											1											1	[AF135287_Guangxi3]
Hap_96:											1											1	[AF135288_Guangxi4]
Hap_97:											1											1	[AF135289_Guangxi5]
Hap_98:											3											3	[AF135290_Guangxi6	AF135294_Guangxi10	AF135296_Guangxi12]
Hap_99:											1											1	[AF135291_Guangxi7]
Hap_100:											1											1	[AF135292_Guangxi8]
Hap_101:											2											2	[AF135293_Guangxi9	AF135298_Guangxi14]
Hap_102:											1											1	[AF135295_Guangxi11]
Hap_103:											3											3	[AF135297_Guangxi13	AF135299_Guangxi15	AF135301_Guangxi17]
Hap_104:											1											1	[AF135300_Guangxi16]
Hap_105:											1											1	[AF135302_Guangxi18]
Hap_106:											1											1	[AF135303_Guangxi19]
Hap_107:											1											1	[AF135304_Guangxi20]
Hap_108:																		1				1	[AY646966_Viet24462]
Hap_109:																		1				1	[AY646965_Viet24460]
Hap_110:																		1				1	[AY646964_Viet24458]
Hap_111:																		1				1	[AY646963_Viet24457]
Hap_112:																		1				1	[AY646962_Viet24456]
Hap_113:																			4			4	[AY647139_BurR568	AY647136_Bur97002	AY647134_Bur95056	AY647132_Bur23276]
Hap_114:																			1			1	[AY647138_BurR566]
Hap_115:																			1			1	[AY647137_BurR565]
Hap_116:																			1			1	[AY647135_Bur97001]
Hap_117:																			2			2	[AY647133_Bur23278	AY647127_Bur23269]
Hap_118:																			2			2	[AY647131_Bur23275	AY647128_Bur23270]
Hap_119:																			1			1	[AY647130_Bur23274]
Hap_120:																			1			1	[AY647129_Bur23272]
Hap_121:																				1		1	[AY647126_WisAQ67]
Hap_122:																				1		1	[AY647125_WisAP65]
Hap_123:																				1		1	[AY647124_WisAP25]
Hap_124:																				11		11	[AY647121_WisAR10	AY647113_NC7-16363	AY647112_NC7-16352	AY647111_NC7-16345	AY647107_Mich088	AY647094_MiaH517	AY647087_Mia83352	AY647074_Lb-6V5	AY647073_Lb-6FT	AY647071_Lb-5W1	AY647069_Lb-5SA]
Hap_125:																				7		7	[AY647120_WisAQ30	AY647119_WisAP83	AY647077_Lb-AL04	AY647076_Lb-A4N	AY647075_Lb-A13N	AY647067_Lb-219E	AY647064_DchR925]
Hap_126:																				2		2	[AY647118_WisAP68	AY647085_Mia83345]
Hap_127:																				1		1	[AY647117_WisAP32]
Hap_128:																				1		1	[AY647116_WisAN07]
Hap_129:																				1		1	[AY647123_NC7-16361]
Hap_130:																				2		2	[AY647115_NC7-16580	AY647062_DchR284]
Hap_131:																				1		1	[AY647114_NC7-16431]
Hap_132:																				1		1	[AY647110_NC7-16343]
Hap_133:																				1		1	[AY647109_NC7-11]
Hap_134:																				2		2	[AY647108_Mich123	AY647063_DchR563]
Hap_135:																				2		2	[AY647106_MiaK640	AY647083_Mia36J]
Hap_136:																				1		1	[AY647105_MiaK603]
Hap_137:																				1		1	[AY647104_MiaJ618]
Hap_138:																				4		4	[AY647103_MiaJ617	AY647096_MiaH612	AY647095_MiaH583	AY647080_Mia26J]
Hap_139:																				1		1	[AY647102_MiaJ612]
Hap_140:																				5		5	[AY647101_MiaJ608	AY647089_Mia89-177	AY647088_Mia84324	AY647086_Mia83348	AY647084_Mia83333]
Hap_141:																				3		3	[AY647100_MiaJ463	AY647059_Dch575	AY612638_Macaca_mula]
Hap_142:																				1		1	[AY647099_MiaI741]
Hap_143:																				2		2	[AY647098_MiaH616	AY647093_MiaG648]
Hap_144:																				1		1	[AY647097_MiaH614]
Hap_145:																				1		1	[AY647092_MiaG624]
Hap_146:																				1		1	[AY647091_Mia90138]
Hap_147:																				1		1	[AY647090_Mia90137]
Hap_148:																				1		1	[AY647082_Mia31J]
Hap_149:																				1		1	[AY647081_Mia28J]
Hap_150:																				1		1	[AY647122_Lb-6Y4]
Hap_151:																				1		1	[AY647079_Lb-IPJ]
Hap_152:																				15		15	[AY647078_Lb-C4A1N	AY647056_CayAG97	AY647055_CayAG96	AY647048_CayAD74	AY647047_CayAD66	AY647041_CayAC71	AY647040_CayAC14	AY647038_Cay97L	AY647029_Cay62L	AY647027_Cay39N	AY647026_Cay38N	AY647024_Cay32033	AY647020_Cay20I	AY647019_Cay19O	AY647018_Cay13L]
Hap_153:																				1		1	[AY647072_Lb-6DV]
Hap_154:																				1		1	[AY647070_Lb-5TH]
Hap_155:																				1		1	[AY647068_Lb-557]
Hap_156:																				1		1	[AY647066_Lb-0RE]
Hap_157:																				1		1	[AY647061_DchR251]
Hap_158:																				1		1	[AY647060_Dch584]
Hap_159:																				1		1	[AY647058_CaySBR81]
Hap_160:																				16		16	[AY647057_CayM573	AY647054_CayAE86	AY647051_CayAE07	AY647049_CayAD77	AY647045_CayAD47	AY647044_CayAD41	AY647043_CayAC97	AY647039_CayAC09	AY647034_Cay84L	AY647033_Cay83N	AY647032_Cay72L	AY647031_Cay68L	AY647030_Cay63J	AY647028_Cay51L	AY647025_Cay37L	AY647021_Cay22L]
Hap_161:																				2		2	[AY647053_CayAE73	AY647022_Cay32018]
Hap_162:																				8		8	[AY647052_CayAE64	AY647050_CayAD94	AY647046_CayAD49	AY647042_CayAC73	AY647037_Cay95L	AY647036_Cay88L	AY647035_Cay87N	AY647023_Cay32019]
Hap_163:																					21	21	[AY823296_Nep021	AY823295_Nep020	AY823294_Nep019	AY823293_Nep018	AY823292_Nep017	AY823291_Nep016	AY823290_Nep015	AY823289_Nep014	AY823288_Nep013	AY823287_Nep012	AY823286_Nep011	AY823285_Nep010	AY823284_Nep009	AY823283_Nep008	AY823282_Nep007	AY823281_Nep006	AY823280_Nep005	AY823279_Nep004	AY823278_Nep003	AY823277_Nep002	AY823276_Nep001]
Hap_164:									1													1	[GQ472238Sichuan5]
Hap_165:									1													1	[GQ472239Sichuan6]
Hap_166:									1													1	[GQ472240Sichuan7]
Hap_167:									1													1	[GQ472241Sichuan8]
Hap_168:									1													1	[GQ472242Sichuan9]
Hap_169:									1													1	[GQ472243Sichuan10]
Hap_170:									1													1	[GQ472244Sichuan1]
Hap_171:									1													1	[GQ472245Sichuan2]
Hap_172:									1													1	[GQ472247Sichuan4]
Hap_173:									1													1	[GQ472248Sichuan17]
Hap_174:									1													1	[GQ472249Sichuan18]
Hap_175:									1													1	[GQ472250Sichuan19]
Hap_176:									1													1	[GQ472251Sichuan20]
Hap_177:									1													1	[GQ472252Sichuan21]
Hap_178:									1													1	[GQ472253Sichuan14]
Hap_179:									1													1	[GQ472254Sichuan15]
Hap_180:									1													1	[GQ472255Sichuan16]
Hap_181:									1													1	[GQ472256Sichuan12]
Hap_182:									1													1	[GQ472257Sichuan11]
Hap_183:									1													1	[GQ472258Sichuan13]
Hap_184:									1													1	[GQ472259Sichuan23]
Hap_185:									1													1	[GQ472260Sichuan22]
Hap_186:									1													1	[GQ472261Sichuan24]
Hap_187:									1													1	[GQ472262Sichuan25]
Hap_188:									1													1	[GQ472263Sichuan27]
Hap_189:									1													1	[GQ472264Sichuan26]
Hap_190:									1													1	[GQ472265Sichuan28]
Hap_191:									1													1	[GQ472266Sichuan29]
Hap_192:									1													1	[GQ472267Sichuan30]
Hap_193:									1													1	[GQ472268Sichuan35]
Hap_194:									1													1	[GQ472269Sichuan36]
Hap_195:									1													1	[GQ472270Sichuan37]
Hap_196:									1													1	[GQ472271Sichuan38]
Hap_197:									1													1	[GQ472272Sichuan32]
Hap_198:									1													1	[GQ472273Sichuan31]
Hap_199:									1													1	[GQ472274Sichuan33]
Hap_200:									1													1	[GQ472275Sichuan34]
Hap_201:									1													1	[GQ472276Sichuan39]
Hap_202:									1													1	[GQ472277Sichuan40]
Hap_203:									1													1	[GQ472278Sichuan41]
Hap_204:									1													1	[GQ472279Sichuan42]
Hap_205:									1													1	[GQ472281Sichuan44]
Hap_206:									1													1	[GQ472283Sichuan47]
Hap_207:									1													1	[GQ472284Sichuan46]
Hap_208:									1													1	[GQ472287Sichuan50]
Hap_209:									1													1	[GQ472288Sichuan52]
Hap_210:									1													1	[GQ472289Sichuan51]
Hap_211:									1													1	[GQ472290Sichuan53]
Hap_212:									1													1	[GQ472291Sichuan54]
Hap_213:									1													1	[GQ472292Sichuan55]
Hap_214:									1													1	[GQ472293Sichuan56]
N of M.mulatta	50	45	7	10	7	30	29	10	56	3	26	30	12	30	8	18	35	12	13	109	21	561
	119					125
N of haptypes	16	22	5	7	7	3	2	7	56	2	21	1	11	5	8	1	3	11	8	42	1	214
	39					64
[truncated: 4 more columns]
